# Supplementary material for: Antigen-Presenting Cell-Intrinsic PD-1 Neutralizes PD-L1 in cis to Attenuate PD-1 Signaling in T Cells
Source: PubMed Central journal article supplement — Cell Rep. Author manuscript; Available in PMC 2018 Aug 15. (PMC6093302; doi:10.1016/j.celrep.2018.06.054), 2018-07-10
Supplement: NIHMS1500945-supplement-1.pdf [file NIHMS1500945-supplement-1.pdf]

**Cell Reports, Volume 24**

**Supplemental Information**

**Antigen-Presenting Cell-Intrinsic  
PD-1 Neutralizes PD-L1 in *cis*  
to Attenuate PD-1 Signaling in T Cells**

**Yunlong Zhao, Devin L. Harrison, Yuran Song, Jie Ji, Jun Huang, and Enfu Hui**

## Supplemental Information

### Supplemental figures and tables

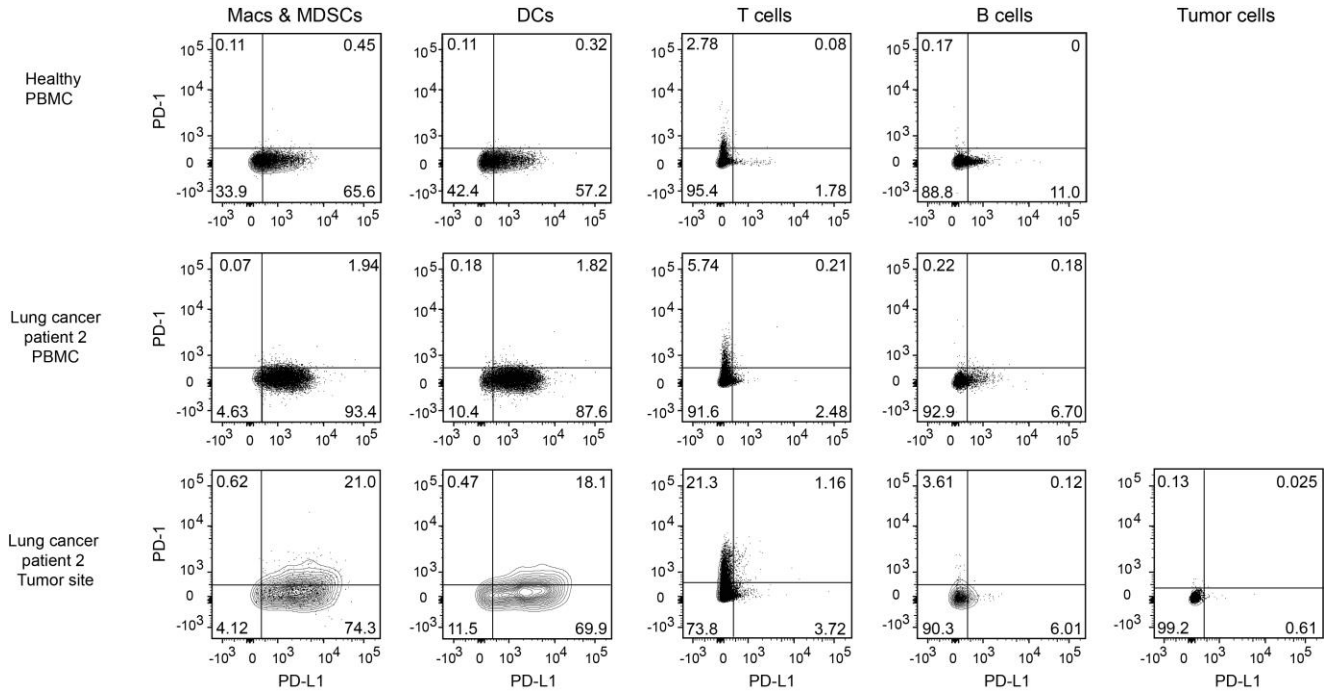

**Figure S1 PD-1 and PD-L1 co-expression in the tumor microenvironment of a second lung cancer patient. Related to Figure 1.** Expression of PD-1 and PD-L1 on the indicated cell types derived from PBMCs of a healthy human individual, from PBMCs of a lung cancer patient, and from the tumor site of the same patient. Both the healthy and lung cancer samples are from a different individual than in **Figure 1**. Cells were gated as described in **Figure 1A**.

- EL4 stained with isotypes
- EL4 stained with APC PD-1 antibody and PE PD-L1 antibody

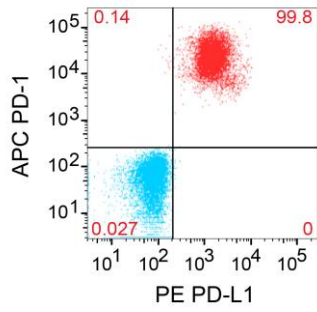

**Figure S2 PD-1 and PD-L1 co-expression on EL4 cells. Related to Figure 1.** Flow cytometry scatter plot showing 99.8% EL4 cells express both PD-1 and PD-L1. Cells double stained with PD-1 and PD-L1 antibodies are shown in red, and cells double stained with the respective isotype antibodies are shown in blue.

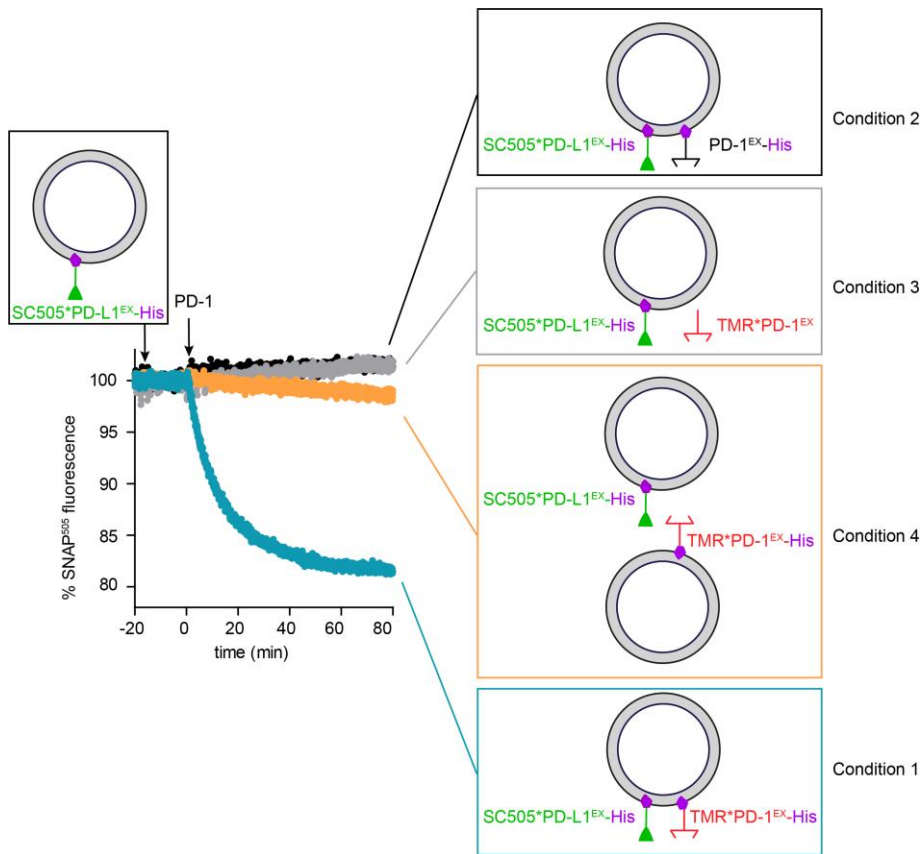

**Figure S3 PD-L1 fluorescence is selectively quenched by *cis*-PD-1. Related to Figure 3.** LUVs reconstituted with SC505\*PD-L1<sup>EX</sup>-His were added with TMR\*PD-1<sup>EX</sup>-His (condition 1), unlabeled PD-L1<sup>EX</sup>-His (condition 2), TMR\*PD-L1<sup>EX</sup> lacking a His-tag (condition 3), or TMR\*PD-1<sup>EX</sup>-His pre-attached to another set of LUVs (condition 4), and the SC505 fluorescence was monitored in real time. Kinetic traces corresponding to the above four conditions are shown in blue, black, gray, and orange, respectively. The resulting geometric distribution of the proteins under each condition was illustrated in the box on the right. In condition 4, because SC505\*PD-L1<sup>EX</sup>-His and TMR\*PD-1<sup>EX</sup>-His were pre-attached to two different sets of LUVs, they could only interact with each other in *trans*. Hence this condition has allowed us to conclude that the contribution of *trans*-interaction in condition 1, and in experiments conducted in **Figure 3B**, was minor during the time course of the assay. Shown is one representative result from three independent replicates.

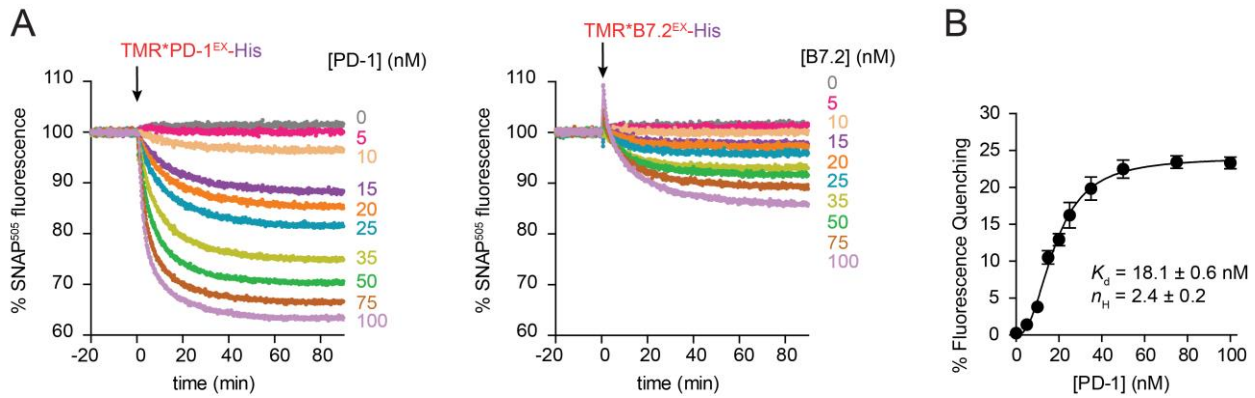

**Figure S4 Quenching of PD-L1 fluorescence depends on the concentration of PD-1. Related to Figure 3.**

(A) LUVs pre-bound with SC505\*PD-L1<sup>EX</sup>-His were added with increasing concentrations of TMR\*PD-1<sup>EX</sup>-His (Left) or equivalent concentrations of TMR\*B7.2<sup>EX</sup>-His (Right). Because B7.2 does not interact with PD-L1 in *cis* (Figure 2A and Figure 3B), TMR\*B7.2<sup>EX</sup>-His mediated quenching of SC505\*PD-L1<sup>EX</sup>-His reflects a molecular crowding effect, and was subtracted from the TMR\*PD-1<sup>EX</sup>-His signal to calculate the % quenching due to PD-1/PD-L1 *cis*-interaction. Shown is one representative result from three independent replicates.

(B) % quenching due to PD-1/PD-L1 *cis*-interaction, calculated from raw traces in A, was plotted as a function of TMR\*PD-1<sup>EX</sup>-His concentration. The data were fit with GraphPad Prism 5.0 using the “Specific binding with Hill Slope” model, yielding the dissociation constant ( $K_d$ ) and Hill coefficient ( $n_H$ ) of the PD-1/PD-L1 *cis*-interaction. Data are presented as mean  $\pm$  SEM from three independent measurements.

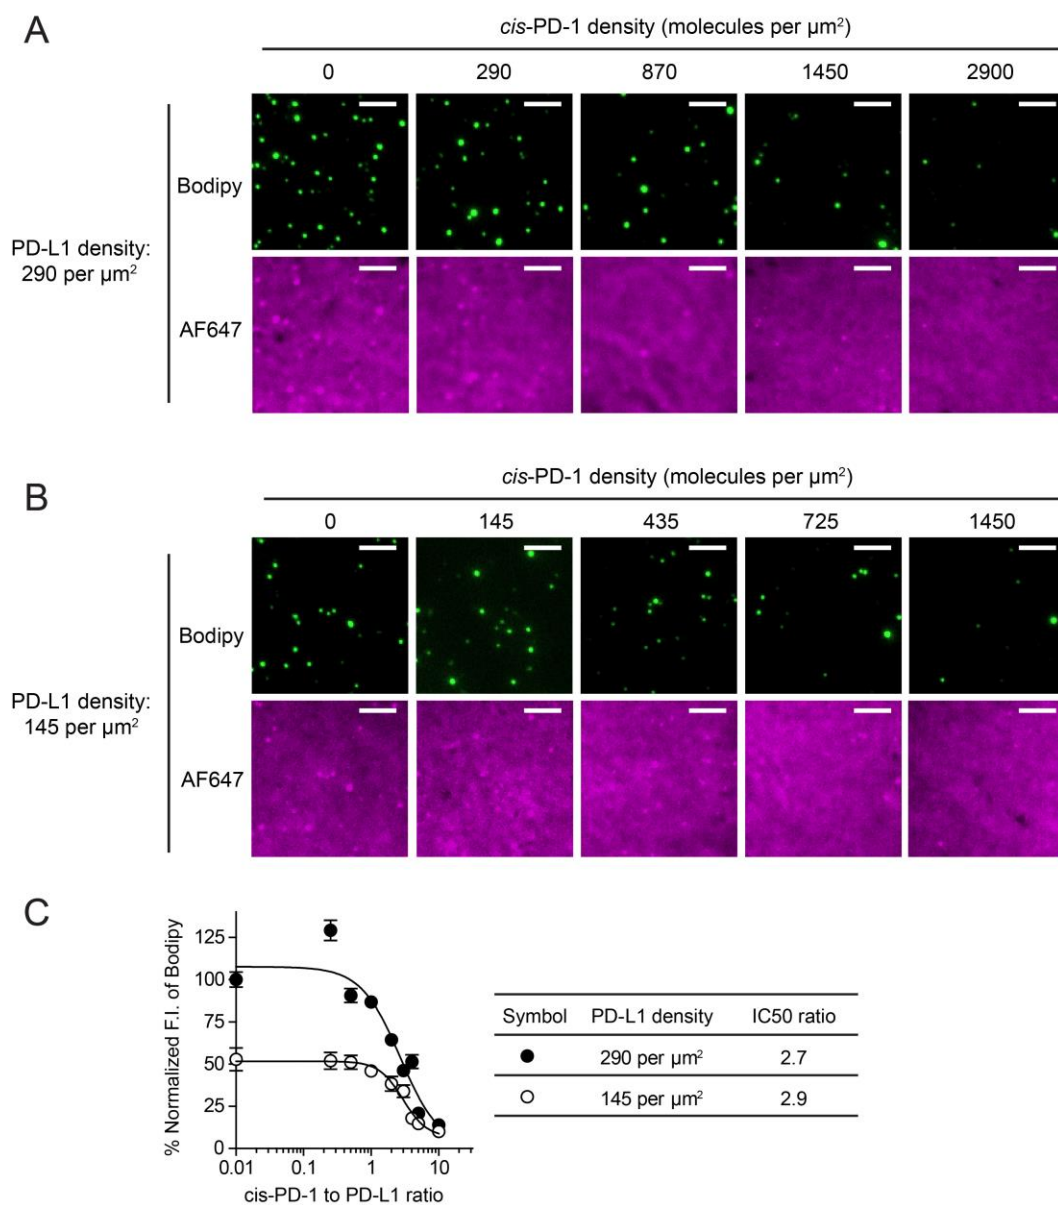

**Figure S5 Titration of *cis*-PD-1 progressively inhibits PD-L1/PD-1 *trans*-interaction. Related to Figure 4.**

(A) SC647\*PD-1<sup>EX</sup> coupled SLB was incubated with Bodipy/DGS-NTA-Ni LUVs carrying PD-L1<sup>EX</sup> at 290 per  $\mu\text{m}^2$  and *cis*-PD-1<sup>EX</sup> at 0, 73, 145, 290, 580, 870, 1160, 1450, and 2900 per  $\mu\text{m}^2$ , as described in **STAR Methods**. Shown in the Bodipy channel are representative TIRF images of SLB-captured Bodipy LUVs at the indicated densities of *cis*-PD-1<sup>EX</sup>. Shown in the AF647 channel are the respective SLB images. Scale bars: 5  $\mu\text{m}$ .

(B) Same as (A) except lowering the LUV PD-L1<sup>EX</sup> density to 145 per  $\mu\text{m}^2$ , and the *cis*-PD-1<sup>EX</sup> densities to 0, 36, 73, 145, 290, 435, 580, 725, and 1450 per  $\mu\text{m}^2$ .

(C) The fluorescence intensity (F. I.) of Bodipy was normalized to the zero *cis*-PD-1 condition, and plotted as a function of *cis*-PD-1 to PD-L1 ratio, with the zero *cis*-PD-1 data plotted at ratio 0.01. The data were fit with GraphPad Prism 5.0 using the “Dose response - inhibition” model, yielding the 50% inhibition concentration (IC50). Data are presented as mean  $\pm$  SEM from at least ten independent TIRF fields.

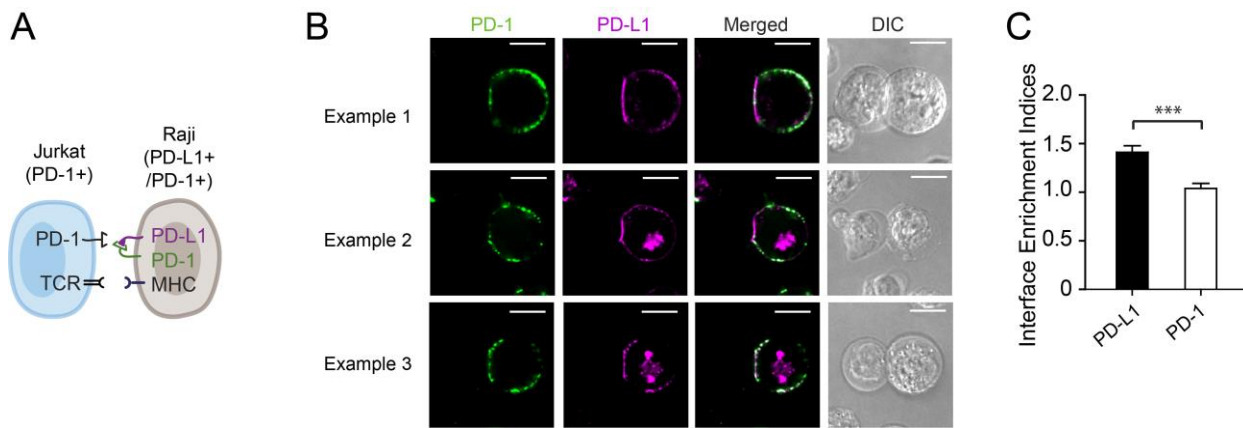

**Figure S6 *Cis*-PD-1 on Raji APCs does not enrich to the interface. Related to Figure 6.**

(A) A cartoon showing Raji co-transduced with PD-L1–mCherry (denoted as magenta PD-L1) and PD-1–mGFP (denoted as green PD-1) conjugated with Jurkat transduced with PD-1–SNAP (denoted as black PD-1).

(B) Confocal images of three representative Jurkat-Raji conjugates at indicated channels, acquired two minutes after the cell–cell contact. Scale bars: 10  $\mu$ m.

(C) Bar graph summarizing the interface enrichment indices of both conditions shown in A. Mean  $\pm$  SEM, n = 30 cells from three independent experiments.

**A**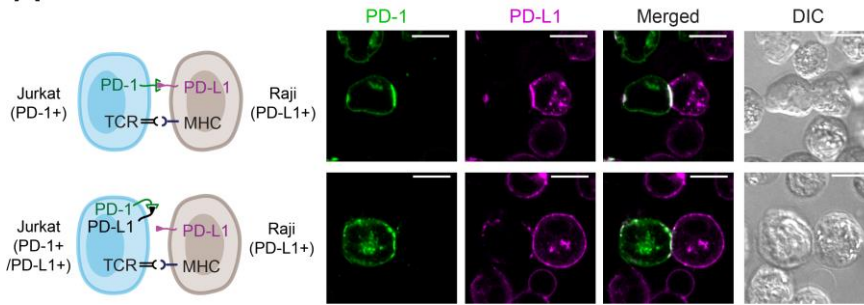**B**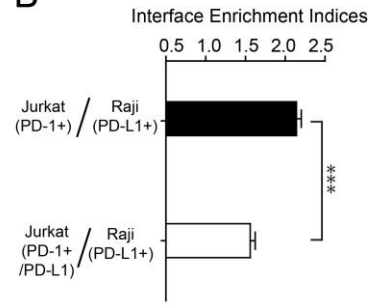

**Figure S7 T cell PD-L1 inhibits the ability of T cell PD-1 to bind PD-L1 in *trans*. Related to Figure 6.**

(A) Left, cartoons showing Raji transduced with PD-L1-mCherry (denoted as magenta PD-L1) conjugated with either Jurkat transduced with PD-1-mGFP (denoted as green PD-1) or Jurkat co-transduced with PD-1-mGFP and PD-L1. Right, representative confocal images of the Jurkat-Raji conjugates at the indicated channels, acquired two minutes after the cell-cell contact. Scale bars: 10  $\mu$ m.

(B) Bar graph summarizing the interface enrichment indices of both conditions shown in A. Mean  $\pm$  SEM, n = 35 cells from three independent experiments.



**Table S1 Summary of PD-1 and PD-L1 surface expressions on various cells. Related to Figure 1.**

| Cell Type          | Molecular density (molecules/ $\mu\text{m}^2$ ) |              |
|--------------------|-------------------------------------------------|--------------|
|                    | PD-1                                            | PD-L1        |
| NSCLC Tumor Cells  | 271                                             | 34           |
| NSCLC B cells      | 297-350                                         | 10-13        |
| NSCLC T cells      | 581-660                                         | 4-13         |
| NSCLC DCs          | 138-172                                         | 32-43        |
| NSCLC Macs & MDSCs | 114-146                                         | 27-28        |
| EL4                | $2975 \pm 88$                                   | $137 \pm 17$ |
| HEK293T            | $72 \pm 2$                                      | $91 \pm 5$   |

**Table S1 Summary of PD-1 and PD-L1 surface expressions on various cells. Related to Figure 1.** Shown in this table are PD-1 and PD-L1 surface densities on NSCLC tumor cells, as well as NSCLC infiltrating B cells, T cells, DCs, Macs & MDSCs. Only the PD-1/PD-L1 double positive cells identified in **Figure 1** and **Figure S1** are quantified. Because no double positive tumor cells are found in patient 2 (**Figure S1**), we only report the values for patient 1 (**Figure 1**) here. Data of tumor infiltrating immune cells are reported as a range according to the expression levels in both patients. Data of EL4 and HEK293T are shown as mean  $\pm$  SEM from three independent measurements.

**Table S2 List of Oligos. Related to STAR Methods.**

| Name   | Sequence                                             | Note                                                                                           |
|--------|------------------------------------------------------|------------------------------------------------------------------------------------------------|
| EH-98  | cctttccatgggtctttctgcag atggacgctatgaagagag          | clone signal peptide of HIV envelope glycoprotein into pPPI4, pair with EH-99                  |
| EH-99  | ggtagctccatcggaatctagcatggat                         | clone signal peptide of HIV envelope glycoprotein into pPPI4, pair with EH-98                  |
| EH-100 | tagattccgatggagccaccgcagttc                          | clone Strep-SNAP tag into pPPI4, pair with EH-101                                              |
| EH-101 | gtgatggaattcagattggaatcgacagtctcgctaccgctaccgctacctc | clone Strep-SNAP tag into pPPI4, pair with EH-100                                              |
| EH-102 | ttcaatctgaattccatcaccatcaccatcaccatcaccatcactgagcggc | clone His <sub>10</sub> tag into pPPI4, pair with EH-103                                       |
| EH-103 | agctctagatgcatgctcgagcggccgctcagtgatggtgatg          | clone His <sub>10</sub> tag into pPPI4, pair with EH-102                                       |
| EH-106 | gactgtccgattccaatctggcgtcctctgaagattcaag             | clone CD86 extracellular domain CDS into pPPI4, pair with EH-107                               |
| EH-107 | gtgatggtgatggtgatggccaggaatgtggtctgggggag            | clone CD86 extracellular domain CDS into pPPI4, pair with EH-106                               |
| EH-108 | gactgtccgattccaatctggcccaggatggttcttagac             | clone PD-1 extracellular domain CDS into pPPI4, pair with EH-109                               |
| EH-109 | gtgatggtgatggtgatggcccaccagggttggaaactg              | clone PD-1 extracellular domain CDS into pPPI4, pair with EH-108                               |
| EH-395 | ctctagatgcatgctcgagctcacaccagggttggaaactg            | clone PD-1 extracellular domain CDS without His <sub>10</sub> tag into pPPI4, pair with EH-108 |
| EH-110 | gactgtccgattccaatctggcttactgtcacggttccaag            | clone PD-L1 extracellular domain CDS into pPPI4, pair with EH-111                              |
| EH-111 | gtgatggtgatggtgatggccagtcctttcatttggagga             | clone PD-L1 extracellular domain CDS into pPPI4, pair with EH-110                              |
| EH-247 | gatcgataagcttgatatcg aggcaggcagaagtatgc              | clone dSV40 to replace SFFV in pHR-PD-1-mGFP, pair with EH-248                                 |
| EH-248 | tgggatctgcatgagaattc agcctaggcctcaaaaaag             | clone dSV40 to replace SFFV in pHR-PD-1-mGFP, pair with EH-247                                 |
| EH-203 | ggagctctcgagaattctcatgaggatattgtctgtctt              | clone PD-L1 signal peptide into pHR, pair with EH-427                                          |
| EH-427 | atttcgagctcttgcattgcgttcagcaaatgccag                 | clone PD-L1 signal peptide into pHR, pair with EH-203                                          |
| EH-428 | atggacaaagactgcgaaatg                                | clone CLIP tag into pHR, pair with EH-429                                                      |
| EH-429 | cacctccaccgctaccgctaccgctaccaccagcccaggcttgc         | clone CLIP tag into pHR, pair with EH-428                                                      |
| EH-430 | agcggtagcgggtggaggtggaagcagcttactgtcacggttccaag      | clone PD-L1 into pHR, pair with EH-431                                                         |
| EH-431 | caggtcgactctagagtcgcttacgtctcctcaaatgtgtatc          | clone PD-L1 into pHR, pair with EH-430                                                         |
| EH-52  | ggagctctcgagaattctcatgcagatccacaggcg                 | clone PD-1 signal peptide into pHR, pair with EH-432                                           |
| EH-432 | atttcgcaatcttgtccatgaaccatcctggccgcca                | clone PD-1 signal peptide into pHR, pair with EH-52                                            |
| EH-433 | atggacaaagattgcgaaatgaaac                            | clone SNAP tag into pHR, pair with EH-434                                                      |
| EH-434 | cacctccaccgctaccgctaccgctaccctccagaccgggttacc        | clone SNAP tag into pHR, pair with EH-433                                                      |
| EH-435 | tagcggtagcgggtggaggtggaagcagcttagactcccagacagg       | clone PD-1 into pHR, pair with EH-436                                                          |
| EH-436 | caggtcgactctagagtcgcttacagggccaagagcagtg             | clone PD-1 into pHR, pair with EH-435                                                          |
| EH-400 | ggagctctcgagaattctcatgggactgagtaacattctc             | clone CD86 signal peptide into pHR, pair with EH-440                                           |
| EH-440 | atttcgcaatcttgtccatagcaccagagagcaggaag               | clone CD86 signal peptide into pHR, pair with EH-400                                           |
| EH-441 | tagcggtagcgggtggaggtggaagcagcgtcctctgaagattcaagc     | clone CD86 into pHR, pair with EH-442                                                          |

|        |                                               |                                                                                           |
|--------|-----------------------------------------------|-------------------------------------------------------------------------------------------|
| EH-442 | caggtcgactctagagtcgcttaaaaacatgtatcactttgtcg  | clone CD86 into pHR, pair with EH-441                                                     |
| EH-443 | ttgggggccagggagggcgcccccacagaggtaggtg         | clone PD-1 I126A mutant into pHR, pair with EH-435                                        |
| EH-444 | gtggggccgcctccctggcccccaaggcgc                | clone PD-1 I126A mutant into pHR, pair with EH-436                                        |
| EH-464 | ttcgggtaccgcccggcgatccaatggacaaagattgcgaaatg  | clone SNAP to replace mGFP in pHR-PD-1-mGFP, pair with EH-465                             |
| EH-465 | caggtcgactctagagtcgcccggctttatcccagaccggttacc | clone SNAP to replace mGFP in pHR-PD-1-mGFP, pair with EH-464                             |
| EH-203 | ggagctctcgagaattctcatgaggatattgctgtctt        | clone PD-L1 into pHR to generate pHR-PD-L1-SNAP, pair with EH-516                         |
| EH-516 | ttgatatcctgcagacgcgtcgtctctcctccaaatgtgtatc   | clone PD-L1 into pHR to generate pHR-PD-L1-SNAP, pair with EH-203                         |
| EH-483 | acgcgtctgcaggatatcaag                         | clone SNAP into pHR to generate pHR-PD-L1-SNAP, pair with EH-465                          |
| EH-517 | caccgacagcccaagtgaatgacca                     | synthesis DNA sequence of mouse PD-1 sgRNA to generate pX330GFP-mPD-1_1, pair with EH-518 |
| EH-518 | aaactggctattcacttgggctgt                      | synthesis DNA sequence of mouse PD-1 sgRNA to generate pX330GFP-mPD-1_1, pair with EH-517 |
| EH-519 | caccgagttgagctggcaatcaggg                     | synthesis DNA sequence of mouse PD-1 sgRNA to generate pX330GFP-mPD-1_2, pair with EH-520 |
| EH-520 | aaaccctgattgccagctcaact                       | synthesis DNA sequence of mouse PD-1 sgRNA to generate pX330GFP-mPD-1_2, pair with EH-519 |

**Table S3 List of Recombinant DNA. Related to STAR Methods.**

| <b>DNA</b>                               | <b>SOURCE</b>    | <b>IDENTIFIER</b> |
|------------------------------------------|------------------|-------------------|
| pMD2.G                                   | Addgene          | 12259             |
| psPAX2                                   | Addgene          | 12260             |
| pHR-PD-1-mGFP                            | Hui et al., 2017 | N/A               |
| pPPI4                                    | Lee et al., 2015 | N/A               |
| pPPI4-Strep-SNAP-PD-L1-His <sub>10</sub> | This paper       | N/A               |
| pPPI4-Strep-SNAP-PD-1-His <sub>10</sub>  | This paper       | N/A               |
| pPPI4-Strep-SNAP-PD-1                    | This paper       | N/A               |
| pPPI4-Strep-SNAP-CD86-His <sub>10</sub>  | This paper       | N/A               |
| pHR-CLIP-PD-L1                           | This paper       | N/A               |
| pHR-SNAP-PD-1                            | This paper       | N/A               |
| pHR-SNAP-PD-1 I126A                      | This paper       | N/A               |
| pHR-SNAP-CD86                            | This paper       | N/A               |
| pHR-dSV40-PD-1-mGFP                      | This paper       | N/A               |
| pHR-PD-1-SNAP                            | This paper       | N/A               |
| pHR-PD-L1-SNAP                           | This paper       | N/A               |
| pX330GFP-mPD-1_1                         | This paper       | N/A               |
| pX330GFP-mPD-1_2                         | This paper       | N/A               |
